# Supplementary material for: Catch Estimates and Species Composition of Recreational Fishing in Israel
Source: MDPI journal article supplement (doi:10.3390/fishes8020069), 2023-01-23
Supplement: s1 [file s1]

## Supplementary Materials

**Table S1.** Species identity and abundance as observed in the coastal surveys.

| Species                        | Abundance   | Origin   |
|--------------------------------|-------------|----------|
| <i>Siganus rivulatus</i>       | 1630        | invasive |
| <i>Sillago suezensis</i>       | 440         | invasive |
| <i>Diplodus sargus</i>         | 424         | local    |
| <i>Mugilidae</i>               | 235         | local    |
| <i>Lithognathus mormyrus</i>   | 195         | local    |
| <i>Hemiramphus far</i>         | 77          | invasive |
| <i>Obalda melanura</i>         | 67          | local    |
| <i>Sparus aurata</i>           | 46          | local    |
| <i>Thalassoma pavo</i>         | 40          | local    |
| <i>Trachinotus ovatus</i>      | 34          | local    |
| <i>Caranx crysos</i>           | 30          | local    |
| <i>Diplodus vulgaris</i>       | 24          | local    |
| <i>Epinephelus marginatus</i>  | 23          | local    |
| <i>Lagocephalus sceleratus</i> | 12          | local    |
| <i>Siganus luridus</i>         | 11          | invasive |
| <i>Boops boops</i>             | 10          | local    |
| <i>Pomatomus saltator</i>      | 8           | local    |
| <i>Sarpa salpa</i>             | 6           | local    |
| <i>Scomberomorus commerson</i> | 6           | invasive |
| <i>Saurida undosquamis</i>     | 4           | invasive |
| <i>Dicentrarchus labrax</i>    | 3           | local    |
| <i>Platycephalus indicus</i>   | 3           | invasive |
| <i>Pomadasys incisus</i>       | 3           | local    |
| <i>Tylosurus crocodilus</i>    | 3           | invasive |
| <i>Alepes djedaba</i>          | 2           | invasive |
| <i>Argyrosomus regius</i>      | 2           | local    |
| <i>Alectis alexandrinus</i>    | 1           | local    |
| <i>Balistes Carolinensis</i>   | 1           | local    |
| <i>Diplodus cervinus</i>       | 1           | local    |
| <i>Echeneis naucrates</i>      | 1           | local    |
| <i>Epinephelus aeneus</i>      | 1           | local    |
| <i>Euthynnus alletteratus</i>  | 1           | local    |
| <i>Pempheris vanicolensis</i>  | 1           | invasive |
| <i>Plotosus lineatus</i>       | 1           | invasive |
| <i>Pseudocaranx dentex</i>     | 1           | local    |
| <i>Sargocentron rubrum</i>     | 1           | invasive |
| <i>Sphyræna viridensis</i>     | 1           | local    |
| <i>Umbrina cirrosa</i>         | 1           | local    |
| <b>Total</b>                   | <b>3350</b> |          |

**Table S2.** Species identity and biomass as observed in the coastal surveys.

| Species                        | Biomass (kg) | Origin   |
|--------------------------------|--------------|----------|
| <i>Mugilidae</i>               | 24.330       | *        |
| <i>Siganus rivulatus</i>       | 24.021       | invasive |
| <i>Diplodus sargus</i>         | 23.086       | local    |
| <i>Hemiramphus far</i>         | 12.883       | invasive |
| <i>Caranx crysos</i>           | 8.027        | local    |
| <i>Lagocephalus sceleratus</i> | 7.276        | invasive |
| <i>Sparus aurata</i>           | 6.828        | local    |
| <i>Lithognathus mormyrus</i>   | 6.771        | local    |
| <i>Sillago sihama</i>          | 5.182        | invasive |
| <i>Oblada melanura</i>         | 4.015        | local    |
| <i>Epinephelus marginatus</i>  | 3.510        | local    |
| <i>Pomatomus saltator</i>      | 3.440        | local    |
| <i>Diplodus vulgaris</i>       | 1.834        | local    |
| <i>Umbrina cirrosa</i>         | 1.582        | local    |
| <i>Argyrosomus regius</i>      | 1.112        | local    |
| <i>Trachinotus ovatus</i>      | 0.917        | local    |
| <i>Scomberomorus commerson</i> | 0.620        | invasive |
| <i>Sphyræna viridensis</i>     | 0.539        | local    |
| <i>Euthynnus alletteratus</i>  | 0.526        | local    |
| <i>Sarpa salpa</i>             | 0.437        | local    |
| <i>Dicentrarchus labrax</i>    | 0.405        | local    |
| <i>Epinephelus aeneus</i>      | 0.318        | local    |
| <i>Siganus luridus</i>         | 0.182        | invasive |
| <i>Boops boops</i>             | 0.171        | local    |
| <i>Diplodus cervinus</i>       | 0.085        | local    |
| <i>Echeneis naucrates</i>      | 0.072        | local    |
| <i>Pomadasys incisus</i>       | 0.066        | local    |
| <i>Pseudocaranx dentex</i>     | 0.061        | local    |
| <i>Sargocentron rubrum</i>     | 0.053        | invasive |
| <i>Atherina</i>                | 0.048        | *        |
| <i>Alepes djedaba</i>          | 0.033        | invasive |
| <i>Platycephalus indicus</i>   | 0.020        | invasive |
| <i>Balistes carolinensis</i>   | 0.013        | local    |
| <i>Saurida undosquamis</i>     | 0.006        | invasive |
| <i>Pempheris vanicolensis</i>  | 0.003        | invasive |
| <b>Total</b>                   | <b>138</b>   |          |

**File S1.** Detailed protocols for the trawl and set nets and long-line surveys used for biomass estimates and species composition comparisons.

#### Commercial fishing data sets

## *Trawl data*

### **(a) Obtaining the data**

The trawl fishery data for relative species abundance was based on surveys performed by the Israeli Fisheries Department in the Ministry of Agriculture in the Mediterranean Sea continental shelf and upper slope of Israel, from May 2017 until December 2020. Data was collected on board trawlers using the same gear: either two or four panel nets (with and without sweeps, respectively), with a 40 mm diamond stretched mesh until June 2017, and then with 48 diamond stretched mesh until the end of the survey. Depth range was of 15–167 m between latitudes 31°43N and 33°05N. The data is composed by one box randomly sampled from each of the 279 nets documented (mean haul time was  $4.6 \pm 1.3$  hours). In total 55,728 individuals belonging to 165 species were sampled during the time of the survey. Each individual was documented to species level and measured to the nearest mm. The total catch of each net was weighted (mean weight  $68 \pm 49$  kg) a total of 18.9 ton was documented from which samples represented 1 ton.

### **(b) Calculating the proportion of each species in the catch**

For the relative proportion of each species for the trawl fishing, an additional step was needed as species and size composition estimates were obtained from a standardized sample only. Thus, we multiplied the proportion of species and size bands by the total weight of the nets to receive the biomass of the species in a net. We then summed the total biomass of the species from all nets, calculated the proportion of the species from the total catch of the survey, and multiplied by the annual catch to receive the absolute yearly biomass.

## *Set nets and long-lines*

The southern part of Israel is characterized by sandy beaches with scattered rocky elements. The central-northern coast of Israel is characterized by a rocky reef, with patches of sand in the center becoming continuously rocky reef as one heads northward. Ten fishing ports are located along the Israeli Mediterranean coastline. Of these, between two to three ports fishers predominately fish over sandy substrates and are characterized by professional fishers usually using large mesh sizes ( $> 70$  mm diamond stretched mesh), composing about 30% of fishing vessels (Malamud et al., 2016). The center-northern part of the Israeli coast consists of a combination of professional and traditional fisheries, the latter comprising ~70% of all

fishing vessels (Malamud et al., 2016). These traditional fishers fish close to shore, with a variety of mesh sizes that seldom exceed 43 mm diamond stretched mesh.

Our study uses data collected during two surveys, the first was located in the central-north of Israel in a small traditional fishing port. The second was carried out mostly in the southern part of Israel and is based on land-based surveys in a variety of fishing ports. We elaborate below:

**The first survey** was carried out in at Giv'at Olga, Hadera, Israel (32°44N, 34°87E) at a shallow depth between 3 and 30 m. Data were collected from December 2013 to September 2015 and comprise a total of 347 set nets sampled during 89 fishing trips. Data were based on a single local fisher in order to avoid the variation associated with differences among fishers in experience, deployment method, net location and fishing gear. A total of 7,110 individuals, belonging to 69 species were sampled and measured on board to the nearest mm representing a catch of 1.7 ton (for further information please see Frid and Belmaker 2019).

**The second survey** was conducted between February 2015 – January 2017 and included 154 ground surveys in 12 of the Israeli fishing ports and marinas. The survey included the documentation of fishing pressure and catch by observing the number of active fishing boats in a port and their yield. Both fishers using set nets and long-lines were surveyed. When fishers arrived at port, they were asked for permission to document their catch. With the fisher permission, the catch abundance was documented and the size of the individuals was estimated. A total sum of 7,204 individuals was documented, belonging to 52 species representing a catch of 2.7 ton (Malamud et al 2018).

The data gathered during both surveys was combined to represent the commercial nets and long line fishery.

**Table S3.** Species identity and abundance and origin as documented in the trawl surveys.

| Species                        | Abundance | Origin   |
|--------------------------------|-----------|----------|
| <i>Nemipterus randalli</i>     | 6228      | invasive |
| <i>Upeneus moluccensis</i>     | 5146      | invasive |
| <i>Leiognathus klunzingeri</i> | 3227      | invasive |
| <i>Pagellus acarne</i>         | 2859      | local    |
| <i>Plotosus lineatus</i>       | 2592      | invasive |
| <i>Engraulis encrasicolus</i>  | 1997      | local    |
| <i>Pagellus erythrinus</i>     | 1829      | local    |
| <i>Saurida undosquamis</i>     | 1801      | invasive |
| <i>Boops boops</i>             | 1713      | local    |
| <i>Etrumeus golanii</i>        | 1212      | invasive |
| <i>Trachurus trachurus</i>     | 1071      | local    |

|                                   |     |          |
|-----------------------------------|-----|----------|
| <i>Scomber colias</i>             | 966 | local    |
| <i>Apogon smithi</i>              | 836 | invasive |
| <i>Mullus barbatus</i>            | 769 | local    |
| <i>Lepidotrigla cavillone</i>     | 692 | local    |
| <i>Ostorhinchus fasciatus</i>     | 586 | invasive |
| <i>Lagocephalus suezensis</i>     | 532 | invasive |
| <i>Pomadasys stridens</i>         | 498 | invasive |
| <i>Decapterus russelli</i>        | 445 | invasive |
| <i>Sphyraena chrysotaenia</i>     | 445 | invasive |
| <i>Merluccius merluccius</i>      | 443 | local    |
| <i>Citharus linguatula</i>        | 302 | local    |
| <i>Upeneus pori</i>               | 292 | invasive |
| <i>Sardinella aurita</i>          | 256 | local    |
| <i>Lagocephalus spadiceus</i>     | 249 | invasive |
| <i>Callionymus filamentosus</i>   | 225 | invasive |
| <i>Sardina pilchardus</i>         | 219 | local    |
| <i>Stephanolepis diaspros</i>     | 207 | invasive |
| <i>Lagocephalus sceleratus</i>    | 171 | invasive |
| <i>Spicara maena</i>              | 139 | local    |
| <i>Mullus surmuletus</i>          | 136 | local    |
| <i>Apogon fasciatus</i>           | 130 | invasive |
| <i>Torquigener flavimaculosus</i> | 122 | invasive |
| <i>Spicara flexuosa</i>           | 120 | local    |
| <i>Pagrus coeruleostictus</i>     | 110 | local    |
| <i>Siganus rivulatus</i>          | 105 | invasive |
| <i>Raja clavata</i>               | 93  | local    |
| <i>Macrorhamphosus scolopax</i>   | 87  | local    |
| <i>Dussumieria elopsoides</i>     | 84  | invasive |
| <i>Scomberomorus commerson</i>    | 82  | invasive |
| <i>Sillago sihama</i>             | 82  | invasive |
| <i>Trachurus mediterraneus</i>    | 82  | local    |
| <i>Sphyraena sphyraena</i>        | 81  | local    |
| <i>Caranx crysos</i>              | 80  | local    |
| <i>Serranus hepatus</i>           | 77  | local    |
| <i>Dentex macrophtalmus</i>       | 74  | local    |
| <i>Lagocephalus suezensis</i>     | 73  | invasive |
| <i>Fistularia commersonii</i>     | 62  | invasive |
| <i>Parapenaeus longirostris</i>   | 57  | local    |
| <i>Argentina sphyraena</i>        | 56  | local    |
| <i>Raja miraletus</i>             | 54  | local    |
| <i>Rhinobatos rhinobatos</i>      | 47  | local    |
| <i>Spicara smaris</i>             | 45  | local    |
| <i>Lithognathus mormyrus</i>      | 44  | local    |
| <i>Sparus aurata</i>              | 44  | local    |
| <i>Bothus podas</i>               | 41  | local    |
| <i>Ariosoma balearicum</i>        | 38  | local    |

|                                 |    |          |
|---------------------------------|----|----------|
| <i>Dentex maroccanus</i>        | 31 | local    |
| <i>Seriola dumerili</i>         | 31 | local    |
| <i>Apogon nigripinnis</i>       | 30 | invasive |
| <i>Diplodus sargus</i>          | 29 | local    |
| <i>Pagrus pagrus</i>            | 26 | local    |
| <i>Bregmasceros atlanticus</i>  | 23 | local    |
| <i>Champsodon nudivittatus</i>  | 23 | invasive |
| <i>Cynoglossus sinusarabici</i> | 22 | invasive |
| <i>Balistes capriscus</i>       | 21 | local    |
| <i>Alepes djedaba</i>           | 19 | invasive |
| <i>Trigloporus lastovitzai</i>  | 19 | local    |
| <i>Atherinomorus lacunosus</i>  | 18 | invasive |
| <i>Synodus saurus</i>           | 17 | local    |
| <i>Diplodus vulgaris</i>        | 15 | local    |
| <i>Fistularia petimba</i>       | 14 | invasive |
| <i>Echelus myrus</i>            | 13 | local    |
| <i>Echeneis naucrates</i>       | 11 | local    |
| <i>Lagocephalus spadiceus</i>   | 11 | invasive |
| <i>Priacanthus saggittarius</i> | 11 | invasive |
| <i>Diplodus annularis</i>       | 9  | local    |
| <i>Oblada melanura</i>          | 9  | local    |
| <i>Terapon puta</i>             | 9  | invasive |
| <i>Torpedo torpedo</i>          | 9  | local    |
| <i>Microchirus ocellatus</i>    | 8  | local    |
| <i>Pomadasys incisus</i>        | 8  | local    |
| <i>Torpedo marmorata</i>        | 7  | local    |
| <i>Zeus faber</i>               | 7  | local    |
| <i>Lagocephalus sceleratus</i>  | 6  | invasive |
| <i>Sardinella gibbosa</i>       | 6  | invasive |
| <i>Ophidion barbatum</i>        | 5  | local    |
| <i>Solea solea</i>              | 5  | local    |
| <i>Alectis alexandrinus</i>     | 4  | local    |
| <i>Dasyatis tortonesei</i>      | 4  | local    |
| <i>Lophius budegassa</i>        | 4  | local    |
| <i>Siganus luridus</i>          | 4  | invasive |
| <i>Trichiurus lepturus</i>      | 4  | local    |
| <i>Trigla lucerna</i>           | 4  | local    |
| <i>Uranoscopus scaber</i>       | 4  | local    |
| <i>Serranus cabrilla</i>        | 3  | local    |
| <i>Blennius ocellaris</i>       | 2  | local    |
| <i>Capros aper</i>              | 2  | local    |
| <i>Centrophorus granulosus</i>  | 2  | local    |
| <i>Conger conger</i>            | 2  | local    |
| <i>Dactylopterus volitans</i>   | 2  | local    |
| <i>Dasyatis pastinaca</i>       | 2  | local    |
| <i>Dipturus oxyrinchus</i>      | 2  | local    |

|                              |              |          |
|------------------------------|--------------|----------|
| <i>Platycephalus indicus</i> | 2            | invasive |
| <i>Pterois miles</i>         | 2            | invasive |
| <i>Uranuscopus scaber</i>    | 2            | local    |
| <i>Anthias anthias</i>       | 1            | local    |
| <i>Dentex gibbosus</i>       | 1            | local    |
| <i>Diplodus puntazzo</i>     | 1            | local    |
| <i>Epinephelus aeneus</i>    | 1            | local    |
| <i>Equulites poppei</i>      | 1            | invasive |
| <i>Gobius niger</i>          | 1            | local    |
| <i>Himantura uarnak</i>      | 1            | invasive |
| <i>Lophius piscatorius</i>   | 1            | local    |
| <i>Mustelus mustelus</i>     | 1            | local    |
| <i>Mycteroperca rubra</i>    | 1            | local    |
| <i>Nettastoma melanurum</i>  | 1            | local    |
| <i>Parupeneus forskali</i>   | 1            | invasive |
| <i>Sargocentron rubrum</i>   | 1            | invasive |
| <i>Scorpaena scrofa</i>      | 1            | local    |
| <i>Sparus auriga</i>         | 1            | local    |
| <i>Torpedo nobiliana</i>     | 1            | local    |
| <b>Total</b>                 | <b>41330</b> |          |

**Table S4.** Species identity, abundance, and origin as documented in the set nets surveys.

| Species                        | Abundance | Origin   |
|--------------------------------|-----------|----------|
| <i>Siganus rivulatus</i>       | 2081      | invasive |
| <i>Lithognathus mormyrus</i>   | 2061      | local    |
| <i>Mugilidae</i>               | 1578      | local    |
| <i>Oblada melanura</i>         | 1470      | local    |
| <i>Diplodus sargus</i>         | 1378      | local    |
| <i>Pelates quadrilineatus</i>  | 800       | invasive |
| <i>Sardinella aurita</i>       | 605       | local    |
| <i>Trachinotus ovatus</i>      | 451       | local    |
| <i>Alepes djedaba</i>          | 295       | invasive |
| <i>Scomberomorus commerson</i> | 293       | invasive |
| <i>Pagrus coeruleostictus</i>  | 244       | local    |
| <i>Caranx rhonchus</i>         | 200       | local    |
| <i>Seriola dumerili</i>        | 194       | local    |
| <i>Sparus aurata</i>           | 175       | local    |
| <i>Siganus luridus</i>         | 156       | invasive |
| <i>Sphyræna chrysotaenia</i>   | 152       | invasive |
| <i>Euthynnus alletteratus</i>  | 151       | local    |
| <i>Atherinomorus lacunosus</i> | 120       | local    |
| <i>Pempheris vanicolensis</i>  | 118       | invasive |
| <i>Sphyræna viridensis</i>     | 111       | local    |

|                                |     |          |
|--------------------------------|-----|----------|
| <i>Diplodus vulgaris</i>       | 110 | local    |
| <i>Rhinobatos rhinobatos</i>   | 108 | local    |
| <i>Boops boops</i>             | 101 | local    |
| <i>Mullus barbatus</i>         | 100 | local    |
| <i>Scomber Japonicus</i>       | 100 | local    |
| <i>Hemiramphus far</i>         | 89  | invasive |
| <i>Pseudocaranx dentex</i>     | 85  | local    |
| <i>Caranx crysos</i>           | 83  | local    |
| <i>Pomatomus saltator</i>      | 80  | local    |
| <i>Umbrina cirrosa</i>         | 76  | local    |
| <i>Sargocentron rubrum</i>     | 69  | invasive |
| <i>Decapterus russelli</i>     | 59  | invasive |
| <i>Epinephelus aeneus</i>      | 50  | local    |
| <i>Epinephelus marginatus</i>  | 45  | local    |
| <i>Diplodus cervinus</i>       | 43  | local    |
| <i>Lagocephalus sceleratus</i> | 39  | local    |
| <i>Mycteroperca rubra</i>      | 37  | local    |
| <i>Dasyatis pastinaca</i>      | 29  | local    |
| <i>Pampheris vanicolensis</i>  | 24  | invasive |
| <i>Epinephelus costae</i>      | 23  | local    |
| <i>Lichia amia</i>             | 21  | local    |
| <i>Sarda sarda</i>             | 20  | local    |
| <i>Trachurus mediterraneus</i> | 20  | local    |
| <i>Echeneis naucrates</i>      | 19  | local    |
| <i>Solea solea</i>             | 16  | local    |
| <i>Auxis rochei</i>            | 15  | local    |
| <i>Diplodus puntazzo</i>       | 15  | local    |
| <i>Sciaena umbra</i>           | 15  | local    |
| <i>Balistes carolinensis</i>   | 14  | local    |
| <i>Dentex gibbosus</i>         | 12  | local    |
| <i>Pomadasys incisus</i>       | 12  | local    |
| <i>Lagocephalus spadiceus</i>  | 11  | invasive |
| <i>Sarpa salpa</i>             | 9   | local    |
| <i>Saurida undosquamis</i>     | 8   | invasive |
| <i>Sillago sihama</i>          | 8   | invasive |
| <i>Argyrosomus regius</i>      | 6   | local    |
| <i>Alectis alaxandrinus</i>    | 4   | local    |
| <i>Fistularia commersonii</i>  | 4   | invasive |
| <i>Platycephalus indicus</i>   | 4   | invasive |
| <i>Sardinella maderensis</i>   | 4   | local    |
| <i>Symphodus tinca</i>         | 4   | local    |
| <i>Torepedo torpedo</i>        | 4   | local    |
| <i>Dentex dentex</i>           | 3   | local    |
| <i>Engraulis encrasicolus</i>  | 3   | local    |
| <i>Nemipterus randalli</i>     | 3   | invasive |
| <i>Sparisoma cretense</i>      | 3   | local    |



|                                |              |          |
|--------------------------------|--------------|----------|
| <i>Torpedo marmorata</i>       | 3            | local    |
| <i>Tylosurus acus</i>          | 6            | local    |
| <i>Dicentrarchus labrax</i>    | 2            | local    |
| <i>Mullus surmuletus</i>       | 2            | local    |
| <i>Pagellus erythrinus</i>     | 2            | local    |
| <i>Pagrus auriga</i>           | 2            | local    |
| <i>Upeneus moluccensis</i>     | 2            | invasive |
| <i>Coryphaena hippurus</i>     | 1            | local    |
| <i>Dicentrarchus punctatus</i> | 1            | invasive |
| <i>Pagrus pagrus</i>           | 1            | local    |
| <i>Raja clavata</i>            | 1            | local    |
| <i>Rhinobatos cemiculus</i>    | 1            | local    |
| <i>Scorpaena porcus</i>        | 1            | local    |
| <i>Stephanolepis diaspros</i>  | 1            | invasive |
| <i>Trachinus draco</i>         | 1            | local    |
| <b>Total</b>                   | <b>14267</b> |          |

**Table S5.** Summary of the GAM fitted for the number of fishers per km. The response variable was number of fishers/km and the predictors were the day of the week (weekend or weekday) and month, which were treated as fixed effects, and fishing site which was treated as a random effect.

| Number of fishers model    |          |            |         |         |
|----------------------------|----------|------------|---------|---------|
| A. parametric coefficients | Estimate | Std. Error | t-value | p-value |
| Day in the week            | 0.6565   | 0.1192     | 5.506   | <0.001  |
| B. smooth terms            | Edf      | Ref.df     | F-value | p-value |
| Month                      | 3.792    | 10         | 28.27   | <0.001  |
| Site                       | 31.818   | 42         | 163.68  | <0.001  |
| Deviance explained         | 48%      |            |         |         |
| N                          | 274      |            |         |         |

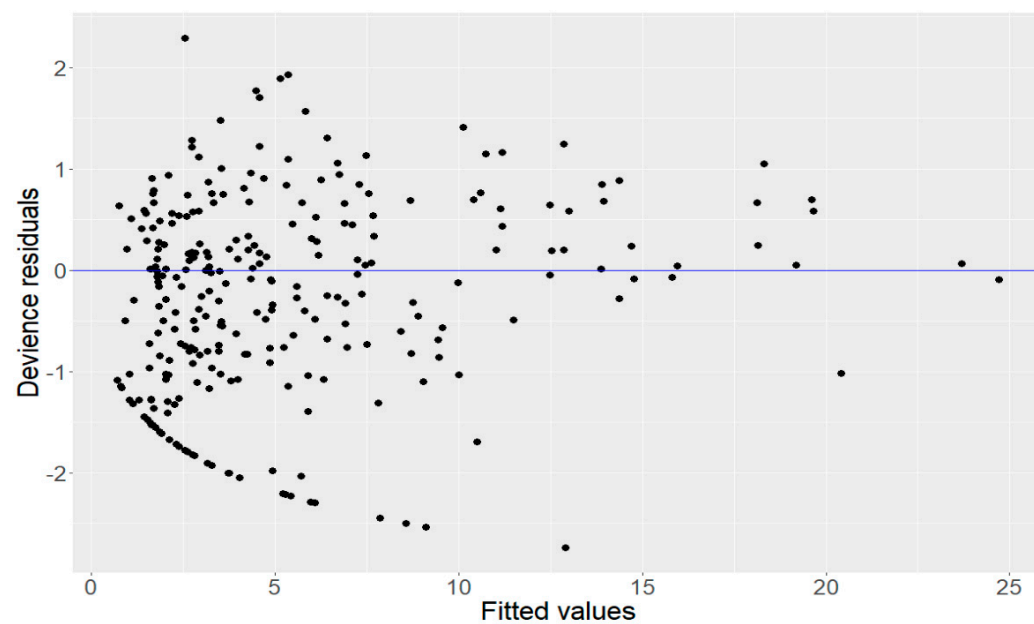

**Figure S1.** Number of fisher model: deviance vs. fitted values.

**Table S6.** Summary of the GAM fitted for the angling annual biomass. The response variable was biomass (kg) and the predictors were fishing duration (h), month, fisher experience (year), and fishing site that was treated as a random effect.

| Biomass model              |          |            |         |         |
|----------------------------|----------|------------|---------|---------|
| A. parametric coefficients | Estimate | Std. Error | t-value | p-value |
| B. smooth terms            | Edf      | Ref.df     | F-value | p-value |
| Fishing duration           | 6.294    | 7.750      | 17.932  | <0.001  |
| Month                      | 3.429    | 10         | 3.529   | <0.001  |
| Fisher experience (years)  | 2.873    | 3.582      | 6.237   | <0.001  |
| Site                       | 23.244   | 42         | 0.953   | <0.001  |
| Deviance explained         | 30.9%    |            |         |         |
| N                          | 1034     |            |         |         |

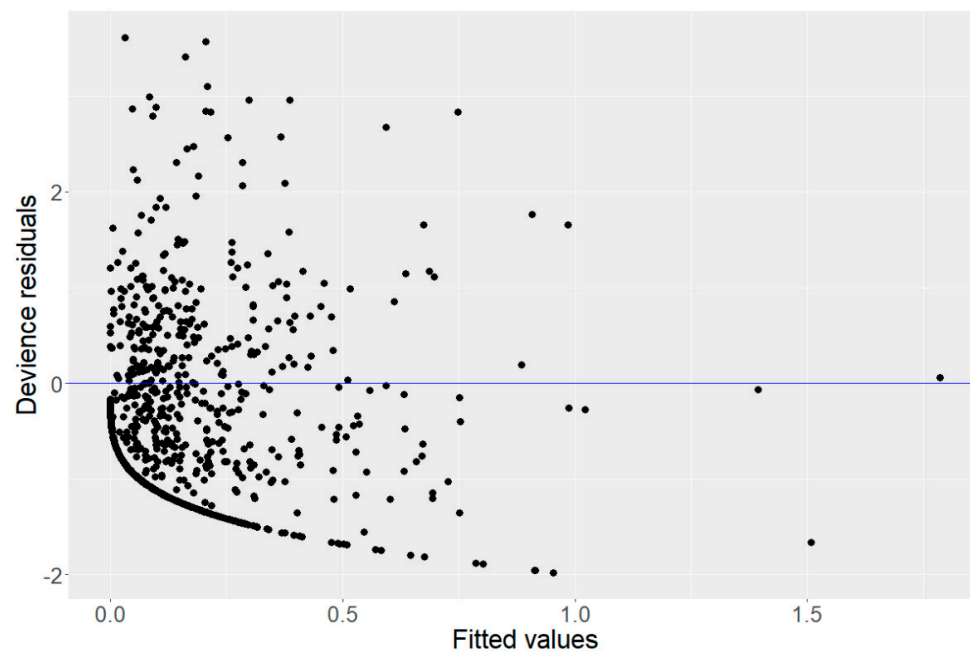

**Figure S2.** Biomass model: deviance vs. fitted values.

**Table S7.** Fisher model - AIC model selection results.

| <b>Fishermen model</b>                                                            | <b>df</b> | <b>AICc</b>     | <b>delta</b>     | <b>weight</b>   |
|-----------------------------------------------------------------------------------|-----------|-----------------|------------------|-----------------|
| <i>month + site + day of the week</i>                                             | 40        | 1440.857        | 0                | 2.33E-01        |
| <i>month + weather condition + site + day of the week</i>                         | 41        | 1440.883        | 0.0251457        | 2.30E-01        |
| <i>fishing time + region + month + weather condition + site + day of the week</i> | 44        | 1440.985        | 0.1279656        | 2.18E-01        |
| <i>fishing time + month + weather condition + site + day of the week</i>          | 45        | 1442.19         | 1.3320652        | 1.20E-01        |
| <i>fishing time + month + weather condition + site + day of the week</i>          | 45        | 1442.19         | 1.3320652        | 1.20E-01        |
| <b><i>fishing time + month + site + day of the week</i></b>                       | <b>44</b> | <b>1442.999</b> | <b>2.1411045</b> | <b>7.98E-02</b> |
| <i>Region + month + day of the week + hot spot</i>                                | 11        | 1463.725        | 22.8676594       | 2.52E-06        |
| <i>fishing time + region + month + weather condition + day of the week</i>        | 15        | 1468.805        | 27.9477217       | 1.99E-07        |

**Table S8.** Biomass model - AIC model selection results.

| <b>Biomass model</b>                                                                                             | <b>df</b> | <b>AICc</b>    | <b><math>\Delta</math>AICc</b> | <b>Weight</b>   |
|------------------------------------------------------------------------------------------------------------------|-----------|----------------|--------------------------------|-----------------|
| <b><i>fishing time + month + years fishing + interview time + site</i></b>                                       | <b>44</b> | <b>1039.79</b> | <b>0</b>                       | <b>7.03E-01</b> |
| <i>fishing time + month + years fishing + region + interview time + site</i>                                     | 45        | 1041.518       | 1.7279                         | 2.96E-01        |
| <i>fishing time + month + years fishing + site</i>                                                               | 40        | 1053.75        | 13.96                          | 6.54E-04        |
| <i>fishing time + month + years fishing + region + reserve + interview time</i>                                  | 24        | 1067.262       | 27.472                         | 7.61E-07        |
| <i>fishing time + month + years fishing + region + interview time</i>                                            | 24        | 1069.004       | 29.215                         | 3.18E-07        |
| <i>fishing time + month + years fishing + region + interview time + rod type + substrate + weather condition</i> | 31        | 1070.395       | 30.606                         | 1.59E-07        |
| <i>fishing time + month + years fishing + region + reserve + weather condition</i>                               | 22        | 1077.53        | 37.741                         | 4.48E-09        |
| <i>fishing time + month + years fishing + region</i>                                                             | 20        | 1077.691       | 37.902                         | 4.14E-09        |
| <i>fishing time + month + years fishing</i>                                                                      | 17        | 1086.285       | 46.495                         | 5.63E-11        |
| <i>fishing time + month + years fishing + reserve</i>                                                            | 18        | 1088.337       | 48.547                         | 2.02E-11        |
| <i>fishing time + month</i>                                                                                      | 13        | 1116.14        | 76.351                         | 1.85E-17        |
| <i>fishing time + interview time + rod type + substrate + weather condition</i>                                  | 23        | 1127.861       | 88.071                         | 5.28E-20        |
| <i>fishing time</i>                                                                                              | 9         | 1147.223       | 107.43                         | 3.30E-24        |

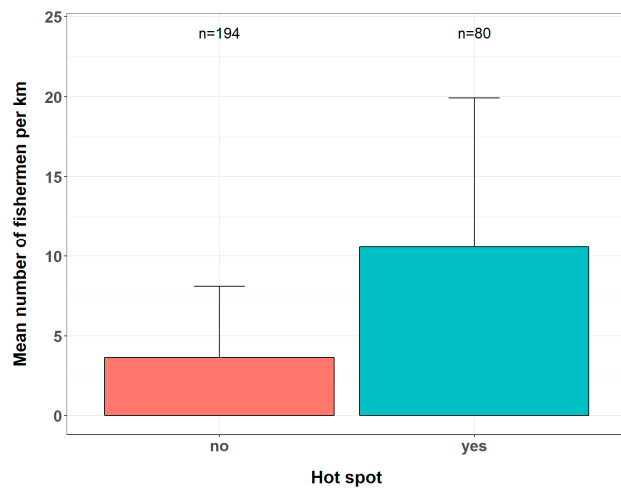

**Figure S3.** The mean number of fishers in a hotspot compared to a non-hotspot site. Error bars represent standard error.

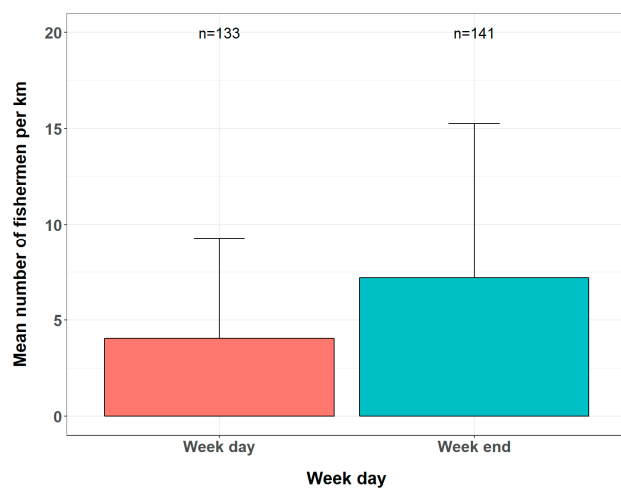

**Figure S4.** The mean number of fishers on a weekday and weekends. Error bars represent standard error.

**Table S9.** Species identity, abundance, and origin as documented in the phone surveys.

| Species                        | Abundance | Origin   |
|--------------------------------|-----------|----------|
| <i>Nemipterus randalli</i>     | 283       | invasive |
| <i>Scomberomorus commerson</i> | 70        | invasive |

|                                |             |          |
|--------------------------------|-------------|----------|
| <i>lagocephalus sceleratus</i> | 67          | local    |
| <i>Pagellus erythrinus</i>     | 65          | local    |
| <i>Diplodus sargus</i>         | 62          | local    |
| <i>Pagrus coeruleostictus</i>  | 57          | local    |
| <i>Dentex gibbosus</i>         | 51          | local    |
| <i>Spicara smaris</i>          | 40          | local    |
| <i>Mugilidae</i>               | 34          | local    |
| <i>Seriola dumerili</i>        | 29          | local    |
| <i>Mycteroperca rubra</i>      | 28          | local    |
| <i>Serranus scriba</i>         | 25          | local    |
| <i>Euthynnus alletteratus</i>  | 21          | local    |
| <i>Coryphaena hippurus</i>     | 18          | local    |
| <i>Epinephelus marginatus</i>  | 17          | local    |
| <i>Epinephelus aeneus</i>      | 15          | local    |
| <i>Thunnus alalunga</i>        | 12          | local    |
| <i>Sargocentron rubrum</i>     | 11          | invasive |
| <i>Alepes djedaba</i>          | 10          | invasive |
| <i>Caranx crysos</i>           | 10          | local    |
| <i>Diplodus cervinus</i>       | 10          | local    |
| <i>Epinephelus costae</i>      | 8           | local    |
| <i>Scomber japonicus</i>       | 8           | local    |
| <i>Balistes carolinensis</i>   | 7           | local    |
| <i>Trachurus mediterraneus</i> | 7           | local    |
| <i>Sparus aurata</i>           | 5           | local    |
| <i>Trachinotus ovatus</i>      | 5           | local    |
| <i>Pomatomus saltator</i>      | 4           | local    |
| <i>Siganus rivulatus</i>       | 4           | invasive |
| <i>Rhinobatos rhinobatos</i>   | 3           | local    |
| <i>Schedophilus ovalis</i>     | 3           | local    |
| <i>Argyrosomus regius</i>      | 2           | local    |
| <i>Merluccius merluccius</i>   | 2           | local    |
| <i>Sarda sarda</i>             | 2           | local    |
| <i>Dicentrarchus labrax</i>    | 1           | local    |
| <i>Diplodus vulgaris</i>       | 1           | local    |
| <i>Lithognathus mormyrus</i>   | 1           | local    |
| <i>Naucrates ductor</i>        | 1           | local    |
| <i>Saurida undosquamis</i>     | 1           | invasive |
| <b>Grand Total</b>             | <b>1010</b> |          |

**Table S10.** Species identity, biomass, and origin as documented in the phone surveys.

| species                        | Biomass (kg) | Origin   |
|--------------------------------|--------------|----------|
| <i>Lagocephalus sceleratus</i> | 147.48       | invasive |
| <i>Scomberomorus commerson</i> | 136.65       | invasive |
| <i>Seriola dumerili</i>        | 130.35       | local    |
| <i>Thunnus alalunga</i>        | 103.50       | local    |

|                                |               |          |
|--------------------------------|---------------|----------|
| <i>Euthynnus alletteratus</i>  | 47.44         | local    |
| <i>Mycteroperca rubra</i>      | 43.75         | local    |
| <i>Epinephelus marginatus</i>  | 27.25         | local    |
| <i>Pagrus coeruleostictus</i>  | 25.07         | local    |
| <i>Mugilidae</i>               | 24.12         | local    |
| <i>Nemipterus randalli</i>     | 20.63         | invasive |
| <i>Epinephelus aeneus</i>      | 19.64         | local    |
| <i>Coryphaena hippurus</i>     | 19.00         | local    |
| <i>Diplodus sargus</i>         | 13.52         | local    |
| <i>Pagellus erythrinus</i>     | 12.12         | local    |
| <i>Dentex gibbosus</i>         | 10.35         | local    |
| <i>Epinephelus costae</i>      | 8.85          | local    |
| <i>Caranx crysos</i>           | 7.15          | local    |
| <i>Argyrosomus regius</i>      | 7.00          | local    |
| <i>Balistes carolinensis</i>   | 6.20          | local    |
| <i>Rhinobatos rhinobatos</i>   | 6.06          | local    |
| <i>Diplodus cervinus</i>       | 5.25          | local    |
| <i>Serranus scriba</i>         | 5.00          | local    |
| <i>Trachurus mediterraneus</i> | 4.73          | local    |
| <i>Sarda sarda</i>             | 2.14          | local    |
| <i>Sparus aurata</i>           | 1.90          | local    |
| <i>Schedophilus ovalis</i>     | 1.55          | local    |
| <i>Trachinotus ovatus</i>      | 1.50          | local    |
| <i>Sargocentron rubrum</i>     | 1.24          | invasive |
| <i>Dicentrarchus labrax</i>    | 1.20          | local    |
| <i>Scomber japonicus</i>       | 1.05          | local    |
| <i>Loligo vulgaris</i>         | 0.86          | local    |
| <i>Spicara smaris</i>          | 0.81          | local    |
| <i>Naucrates ductor</i>        | 0.75          | local    |
| <i>Pomatomus saltator</i>      | 0.62          | local    |
| <i>Alepes djedaba</i>          | 0.42          | invasive |
| <i>Sepia officinalis</i>       | 0.40          | local    |
| <i>Siganus rivulatus</i>       | 0.40          | local    |
| <i>Merluccius merluccius</i>   | 0.25          | local    |
| <i>Lithognathus mormyrus</i>   | 0.11          | local    |
| <i>Diplodus vulgaris</i>       | 0.06          | local    |
| <i>Saurida undosquamis</i>     | 0.00          | invasive |
| <b>Total</b>                   | <b>846.39</b> |          |

**Table S11.** The common species among recreational and commercial methods.

| <b>Species</b>                 | <b>Recreational angling<br/>from the coast</b> | <b>Set nets &amp;<br/>long-lines</b> | <b>Trawl</b> | <b>Fishing<br/>at sea</b> |
|--------------------------------|------------------------------------------------|--------------------------------------|--------------|---------------------------|
| <i>Alepes djedaba</i>          | v                                              | v                                    | v            | v                         |
| <i>Boops boops</i>             | v                                              | v                                    | v            | v                         |
| <i>Caranx crysos</i>           | v                                              | v                                    | v            | v                         |
| <i>Dentex gibbosus</i>         |                                                | v                                    | v            | v                         |
| <i>Diplodus sargus</i>         | v                                              | v                                    | v            | v                         |
| <i>Diplodus vulgaris</i>       | v                                              | v                                    | v            | v                         |
| <i>Echeneis naucrates</i>      | v                                              | v                                    | v            | v                         |
| <i>Epinephelus aeneus</i>      | v                                              | v                                    | v            | v                         |
| <i>Lagocephalus sceleratus</i> | v                                              | v                                    | v            | v                         |
| <i>Lithognathus mormyrus</i>   | v                                              | v                                    | v            | v                         |
| <i>Mycteroperca rubra</i>      |                                                | v                                    | v            | v                         |
| <i>Nemipterus randalli</i>     |                                                | v                                    | v            | v                         |
| <i>Pagellus erythrinus</i>     |                                                | v                                    | v            | v                         |
| <i>Pagrus coeruleostictus</i>  |                                                | v                                    | v            | v                         |
| <i>Pomadasys incisus</i>       | v                                              | v                                    | v            | v                         |
| <i>Rhinobatos rhinobatos</i>   |                                                | v                                    | v            | v                         |
| <i>Sargocentron rubrum</i>     | v                                              | v                                    | v            | v                         |
| <i>Scomberomorus commerson</i> | v                                              | v                                    | v            | v                         |
| <i>Seriola dumerili</i>        |                                                | v                                    | v            | v                         |
| <i>Siganus luridus</i>         | v                                              | v                                    | v            | v                         |
| <i>Siganus rivulatus</i>       | v                                              | v                                    | v            | v                         |
| <i>Sparus aurata</i>           | v                                              | v                                    | v            | v                         |
| <i>Trachurus mediterraneus</i> |                                                | v                                    | v            | v                         |



**Table S12.** Annual biomass estimates in tons for the species caught in recreational angling from the coast compared to the commercial set nets and long lines and the trawl industry. Only the species common for all methods are shown.

| Species                        | Angling from the coast | Sent nets & long line | Trawl   |
|--------------------------------|------------------------|-----------------------|---------|
| <i>Alepes djedaba</i>          | 0.044                  | 0.782                 | 0.857   |
| <i>Boops boops</i>             | 0.224                  | 0.453                 | 41.311  |
| <i>Caranx crysos</i>           | 10.668                 | 1.421                 | 5.581   |
| <i>Diplodus sargus</i>         | 30.676                 | 95.334                | 2.214   |
| <i>Diplodus vulgaris</i>       | 2.436                  | 0.901                 | 0.619   |
| <i>Echeneis naucrates</i>      | 0.096                  | 0.139                 | 0.670   |
| <i>Epinephelus aeneus</i>      | 0.423                  | 2.939                 | 2.510   |
| <i>Lagocephalus sceleratus</i> | 9.666                  | 1.239                 | 56.745  |
| <i>Lithognathus mormyrus</i>   | 8.996                  | 73.026                | 4.965   |
| <i>Platycephalus indicus</i>   | 0.026                  | 0.021                 | 0.600   |
| <i>Pomadasys incisus</i>       | 0.086                  | 0.020                 | 1.278   |
| <i>Sargocentron rubrum</i>     | 0.070                  | 0.606                 | 0.175   |
| <i>Saurida undosquamis</i>     | 0.007                  | 0.010                 | 122.455 |
| <i>Scomberomorus commerson</i> | 0.822                  | 34.996                | 25.356  |
| <i>Siganus luridus</i>         | 0.243                  | 1.284                 | 0.185   |
| <i>Siganus rivulatus</i>       | 31.920                 | 104.273               | 3.174   |
| <i>Sparus aurata</i>           | 9.075                  | 2.785                 | 3.234   |

**Table S13.** Annual abundance estimates for the species caught in recreational angling from the coast compared to the commercial set nets and long lines and the trawl industry Only the species common for all methods are shown.

| Species                        | Angling from the coast | Sent nets & long line | Trawl   |
|--------------------------------|------------------------|-----------------------|---------|
| <i>Alepes djedaba</i>          | 2791                   | 5170                  | 14490   |
| <i>Boops boops</i>             | 11769                  | 7593                  | 1668514 |
| <i>Caranx crysos</i>           | 30737                  | 4200                  | 53978   |
| <i>Diplodus sargus</i>         | 500654                 | 1072503               | 36875   |
| <i>Diplodus vulgaris</i>       | 42880                  | 12264                 | 13128   |
| <i>Echeneis naucrates</i>      | 1326                   | 198                   | 3996    |
| <i>Epinephelus aeneus</i>      | 1331                   | 1464                  | 649     |
| <i>Lagocephalus sceleratus</i> | 9546                   | 970                   | 125637  |
| <i>Lithognathus mormyrus</i>   | 232767                 | 991999                | 55732   |
| <i>Platycephalus indicus</i>   | 3915                   | 37                    | 446     |
| <i>Pomadasys incisus</i>       | 3799                   | 125                   | 13664   |
| <i>Sargocentron rubrum</i>     | 1318                   | 5540                  | 2442    |
| <i>Saurida undosquamis</i>     | 5004                   | 70                    | 1529038 |
| <i>Scomberomorus commerson</i> | 7956                   | 17696                 | 59936   |
| <i>Siganus luridus</i>         | 13346                  | 13483                 | 3879    |
| <i>Siganus rivulatus</i>       | 1837150                | 1821392               | 83838   |
| <i>Sparus aurata</i>           | 54868                  | 18412                 | 33169   |

**Table S14.** Annual biomass estimates for the species caught in recreational fishing at sea compared to the commercial set nets and long lines and the trawl industry. Only the species common for all methods are shown.

| Species                        | Recreational fishing at sea | Sent nets & long line | Trawl   |
|--------------------------------|-----------------------------|-----------------------|---------|
| <i>Alepes djedaba</i>          | 0.110                       | 0.782                 | 0.855   |
| <i>Caranx crysos</i>           | 1.863                       | 1.421                 | 5.563   |
| <i>Dentex gibbosus</i>         | 2.696                       | 0.043                 | 0.074   |
| <i>Diplodus sargus</i>         | 3.523                       | 95.334                | 2.206   |
| <i>Diplodus vulgaris</i>       | 0.015                       | 0.901                 | 0.617   |
| <i>Epinephelus aeneus</i>      | 5.118                       | 2.939                 | 2.502   |
| <i>Lagocephalus sceleratus</i> | 38.430                      | 1.239                 | 56.560  |
| <i>Lithognathus mormyrus</i>   | 0.030                       | 73.026                | 4.948   |
| <i>Mycteroperca rubra</i>      | 11.400                      | 0.456                 | 0.361   |
| <i>Nemipterus randalli</i>     | 5.377                       | 0.001                 | 218.087 |
| <i>Pagellus erythrinus</i>     | 3.158                       | 0.001                 | 25.124  |
| <i>Pagrus coeruleostictus</i>  | 6.533                       | 9.902                 | 11.592  |
| <i>Rhinobatos rhinobatos</i>   | 1.580                       | 7.807                 | 10.694  |
| <i>Sargocentron rubrum</i>     | 0.323                       | 0.606                 | 0.175   |
| <i>Scomberomorus commerson</i> | 35.607                      | 34.996                | 25.274  |
| <i>Seriola dumerili</i>        | 33.966                      | 20.556                | 9.412   |
| <i>Siganus rivulatus</i>       | 0.104                       | 104.273               | 3.164   |
| <i>Sparus aurata</i>           | 0.495                       | 2.785                 | 3.223   |
| <i>Trachurus mediterraneus</i> | 1.234                       | 0.034                 | 2.742   |

**Table S15.** Annual abundance estimates for the species caught in fishing at sea compared to the commercial set nets and long lines and the trawl industry. Only the species common to all methods are shown.

| Species                        | Recreational fishing at sea | Sent nets & long line | Trawl   |
|--------------------------------|-----------------------------|-----------------------|---------|
| <i>Alepes djedaba</i>          | 2605                        | 5170                  | 14454   |
| <i>Caranx crysos</i>           | 2606                        | 4200                  | 53817   |
| <i>Dentex gibbosus</i>         | 13290                       | 196                   | 398     |
| <i>Diplodus sargus</i>         | 14134                       | 1072503               | 36749   |
| <i>Diplodus vulgaris</i>       | 262                         | 12264                 | 13079   |
| <i>Epinephelus aeneus</i>      | 2867                        | 1464                  | 647     |
| <i>Lagocephalus sceleratus</i> | 17734                       | 970                   | 125250  |
| <i>Lithognathus mormyrus</i>   | 260                         | 991999                | 55550   |
| <i>Mycteroperca rubra</i>      | 6039                        | 479                   | 486     |
| <i>Nemipterus randalli</i>     | 57757                       | 13                    | 5593839 |
| <i>Pagellus erythrinus</i>     | 16365                       | 18                    | 1317567 |
| <i>Pagrus coeruleostictus</i>  | 14397                       | 20876                 | 85005   |
| <i>Rhinobatos rhinobatos</i>   | 782                         | 1911                  | 46183   |
| <i>Sargocentron rubrum</i>     | 2566                        | 5540                  | 2442    |
| <i>Scomberomorus commerson</i> | 18433                       | 17696                 | 59745   |
| <i>Seriola dumerili</i>        | 7573                        | 12702                 | 17907   |
| <i>Siganus rivulatus</i>       | 1043                        | 1821392               | 83582   |

|                                |      |       |       |
|--------------------------------|------|-------|-------|
| <i>Sparus aurata</i>           | 1302 | 18412 | 33055 |
| <i>Trachurus mediterraneus</i> | 1829 | 248   | 57947 |

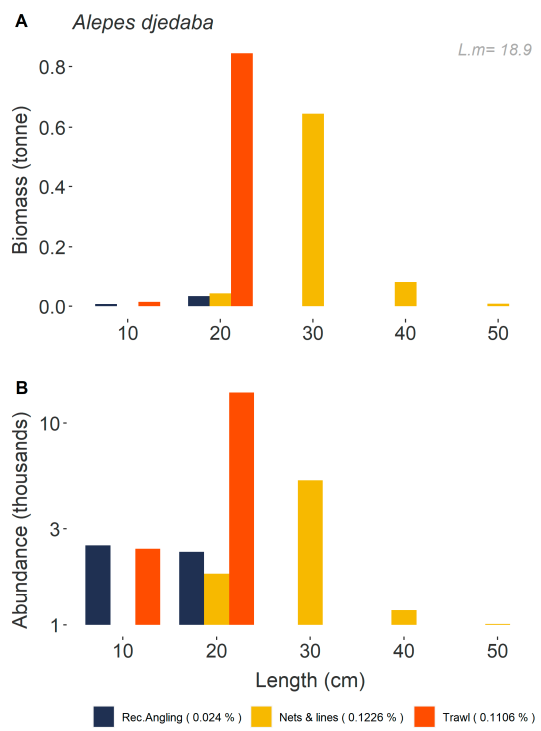

1.

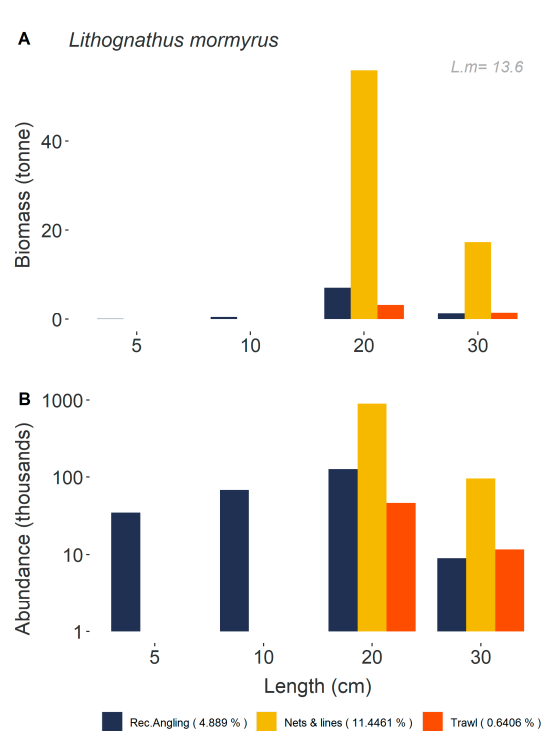

2.

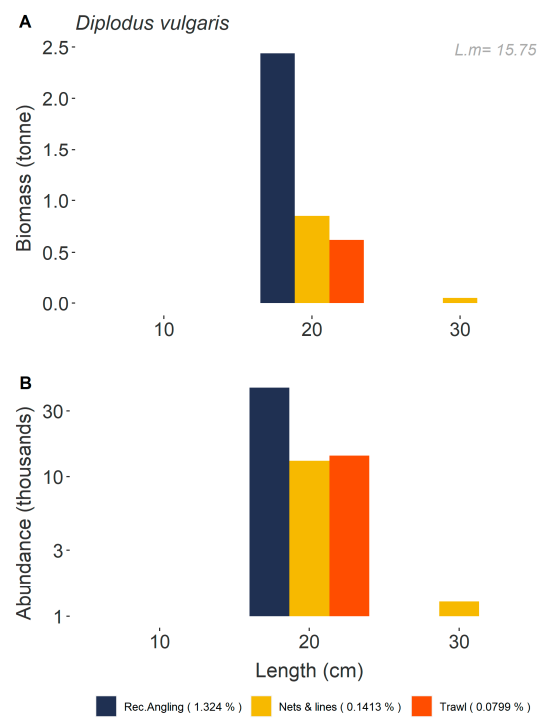

3.

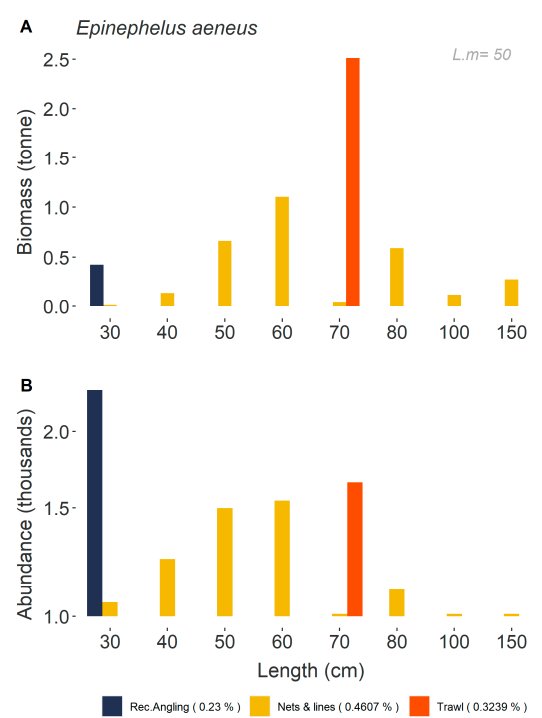

4.

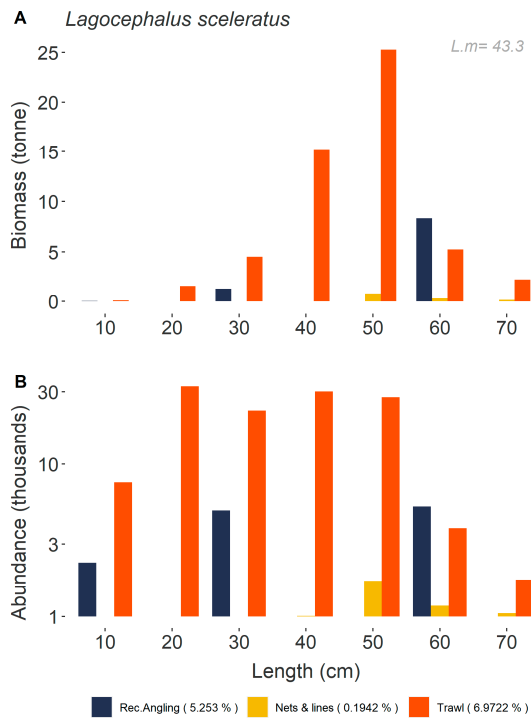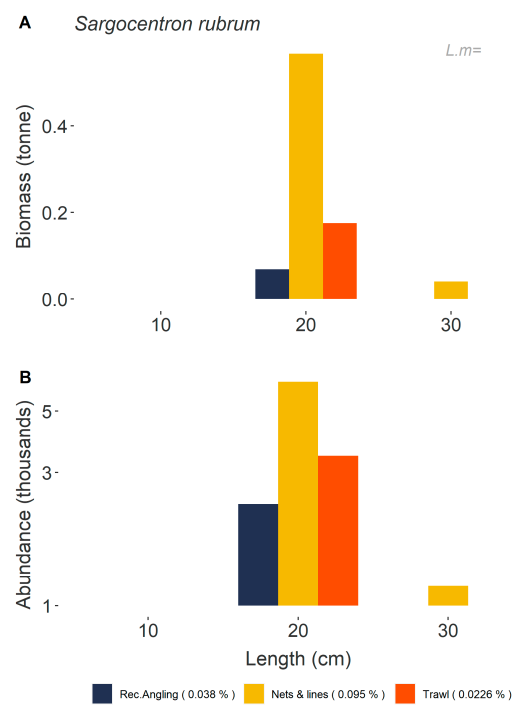

5.

6.

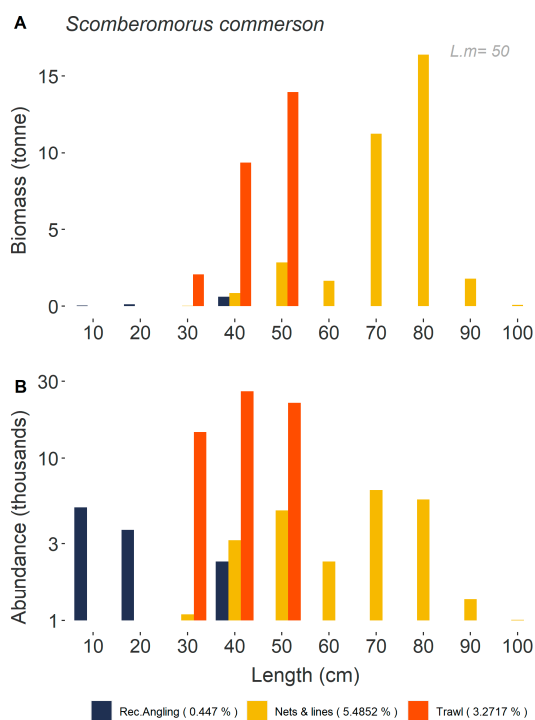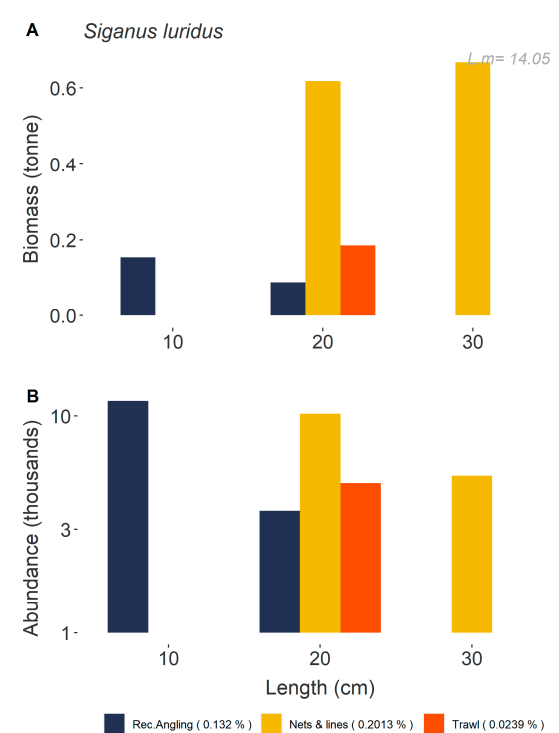

7.

8.

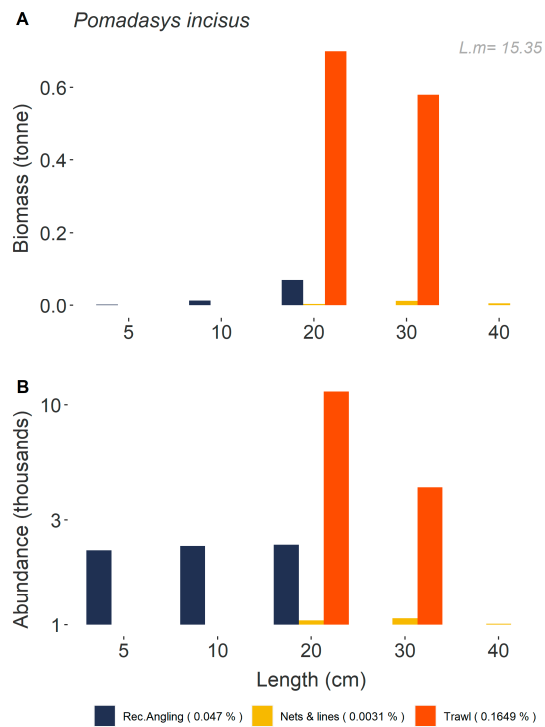

9.

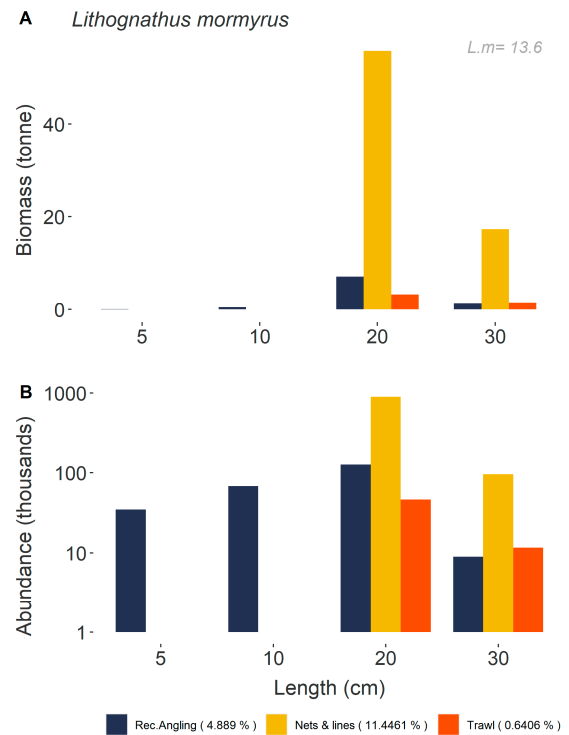

10.

**Figure S5.** Common species of recreational angling from the cost (blue), nets and long-lines (yellow), and trawl fishing (orange). Figures are divided to **(A)** biomass and **(B)** abundance for each individual species. Species were divided by length into size bins represented in the X axis. Length at first maturity (cm) of the species appears at the right upper corner of the figure ( $L.m$ ). The bottom key shows the proportion each species represents from the total catch of the method (in %).

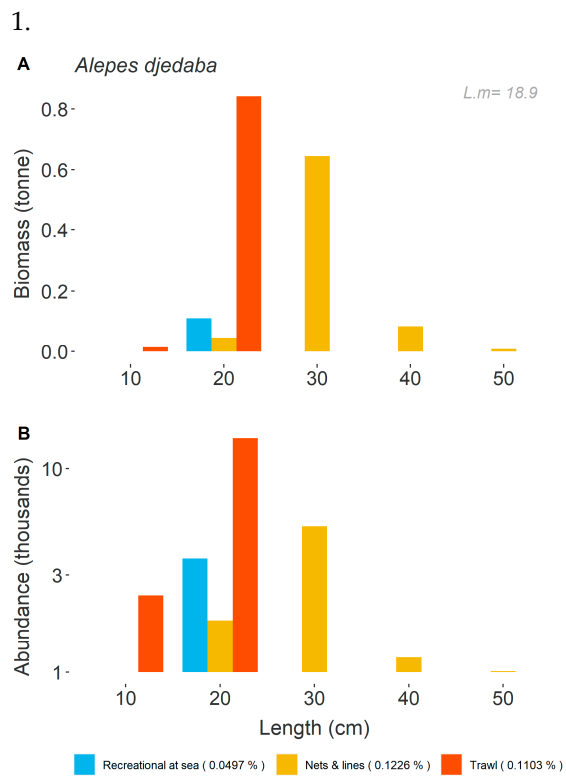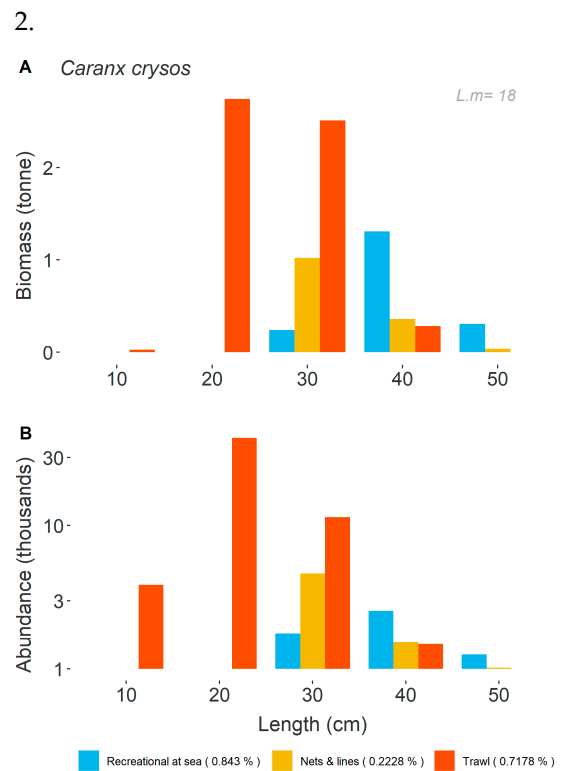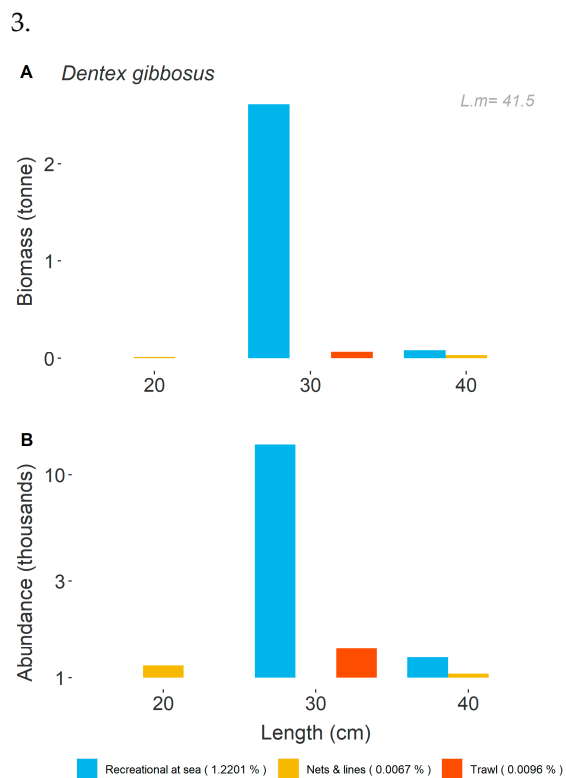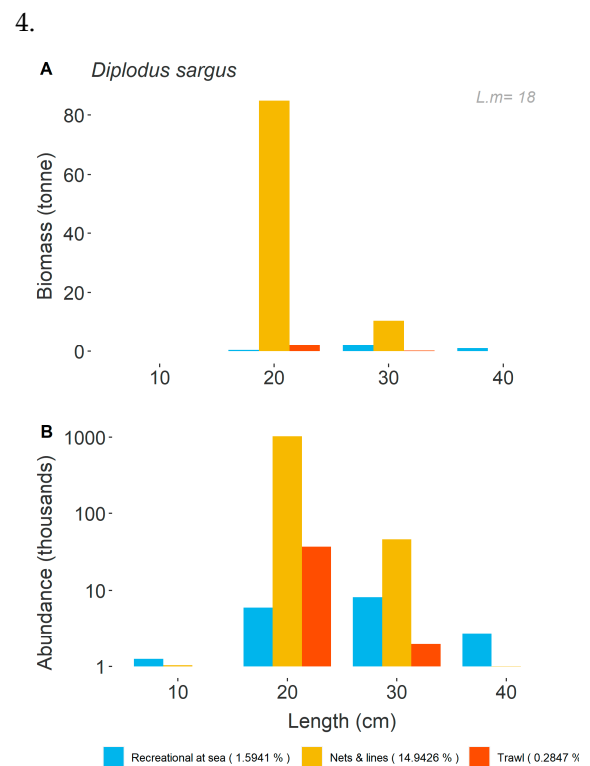

5.

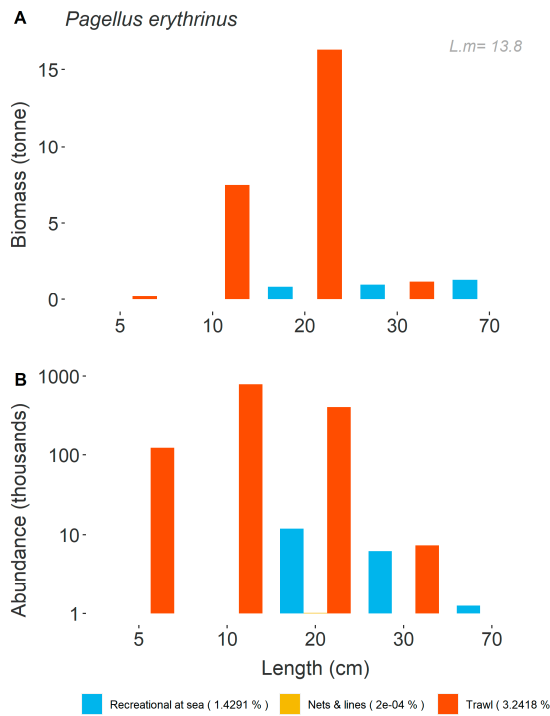

6.

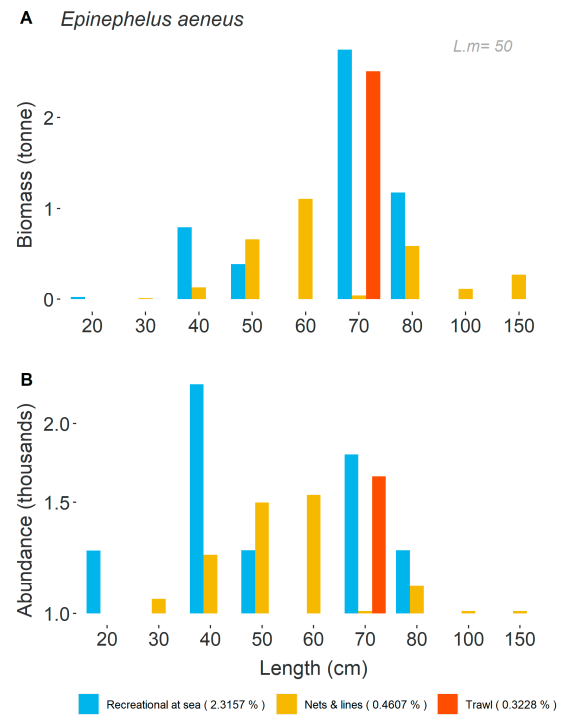

7.

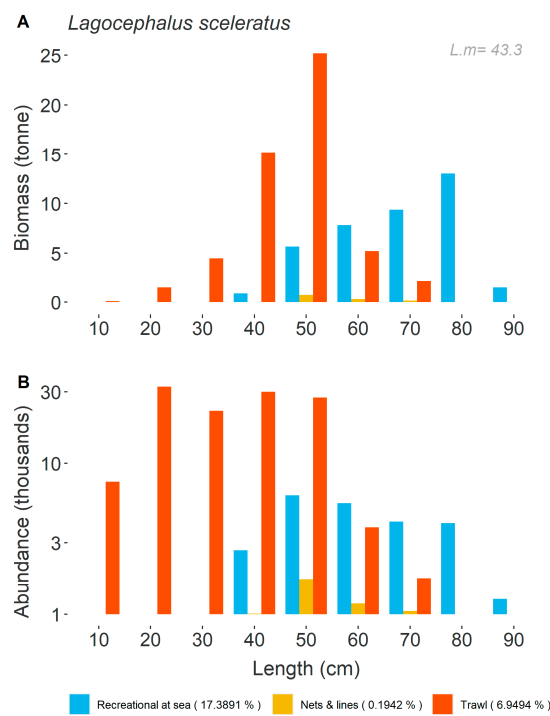

8.

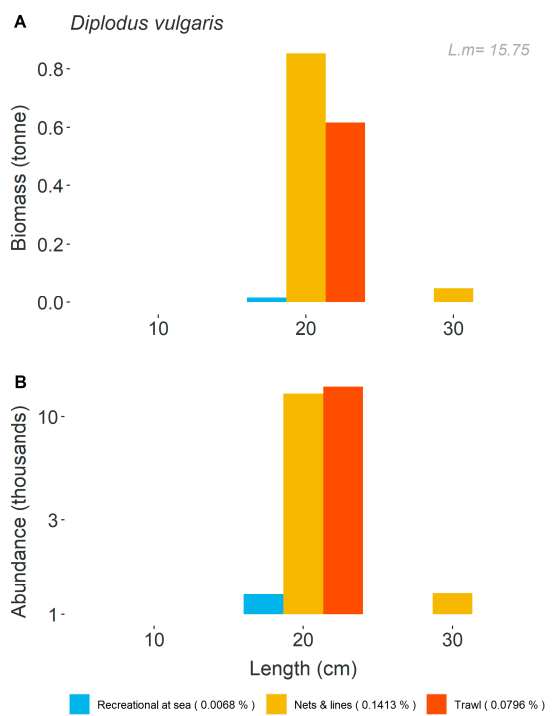

9.

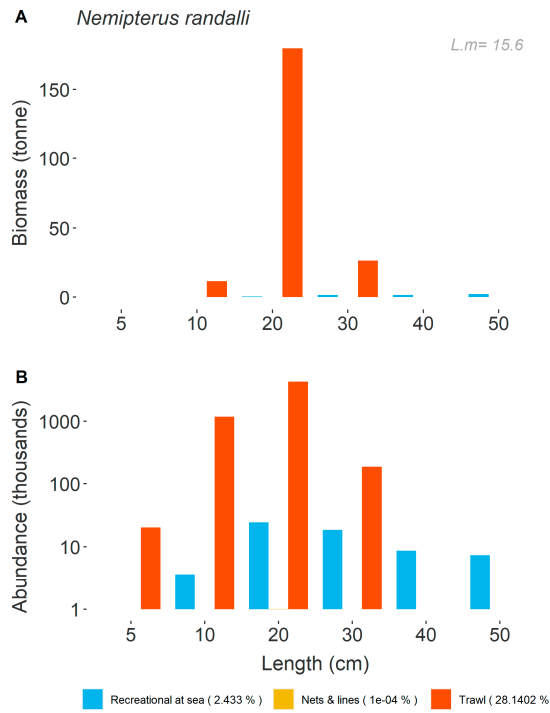

10.

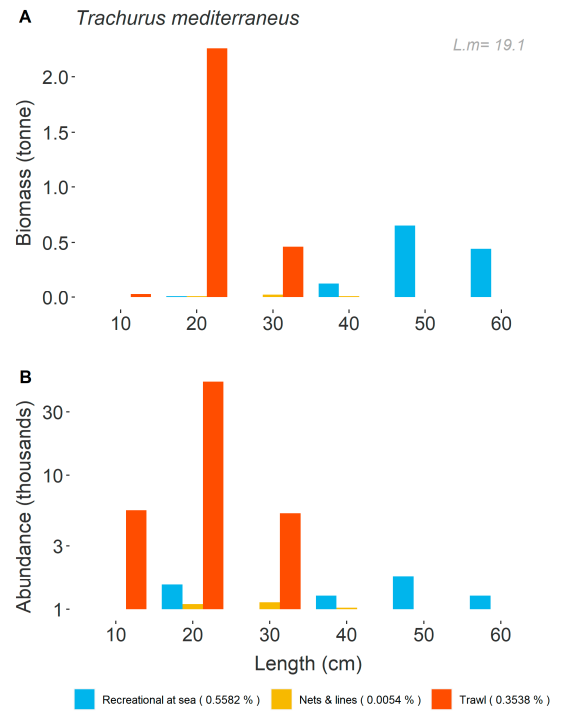

11.

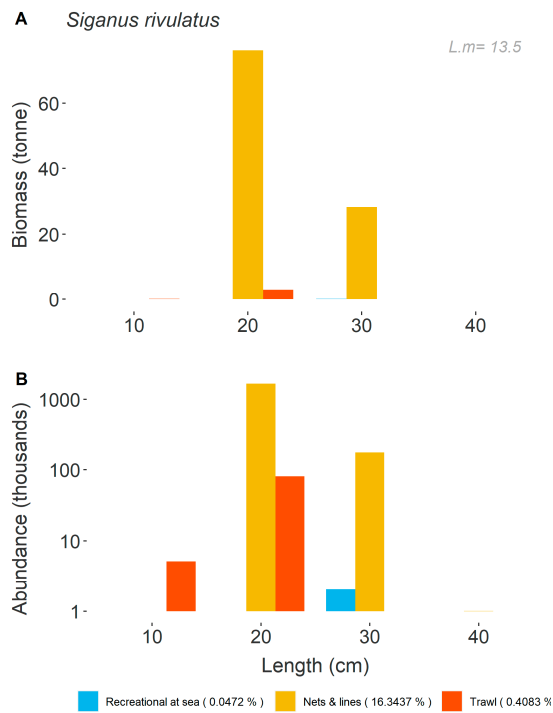

12.

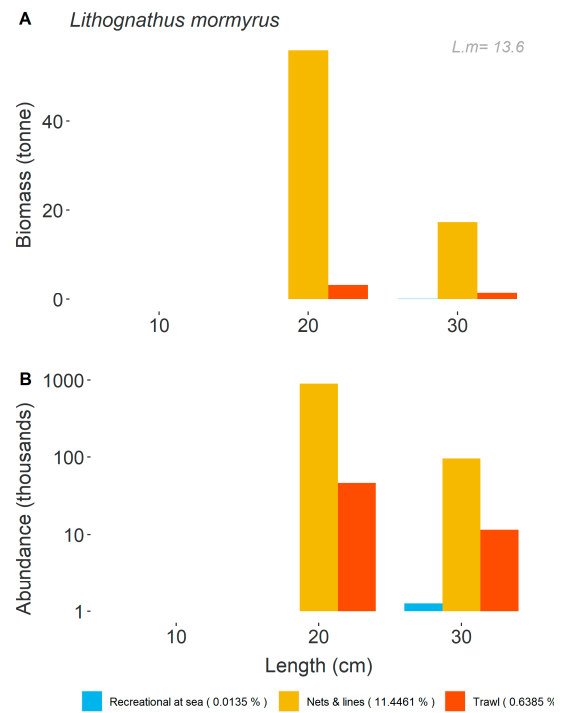



13.

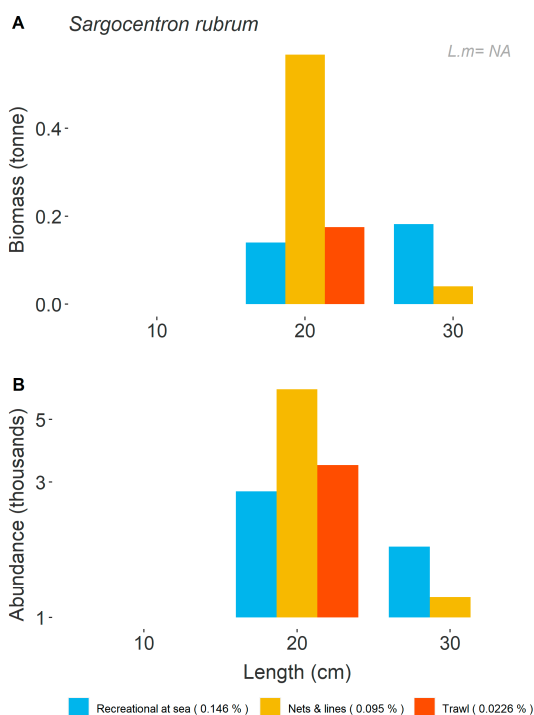

14.

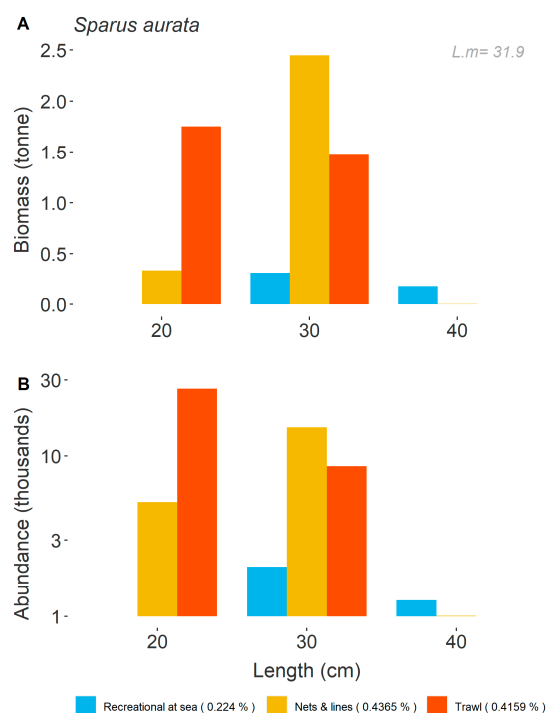

15.

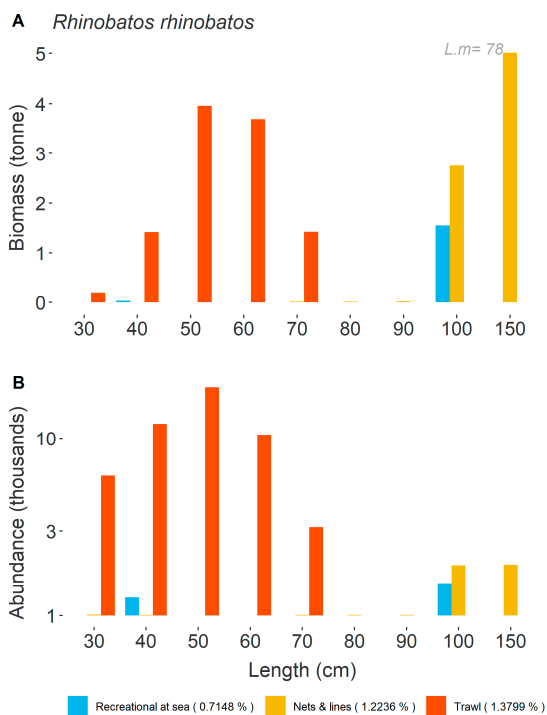

**Figure S6.** Common species of recreational fishing at sea (blue), nets and long-lines (yellow), and trawl fishing (orange). Figures are divided to **(A)** biomass and **(B)** abundance for each individual species. Species were divided by length into size bins

represented in the X axis. Length at first maturity (cm) of the species appears at the right upper corner of the figure (*L.m*). The bottom key shows the proportion each species represents from the total catch of the method (in %).

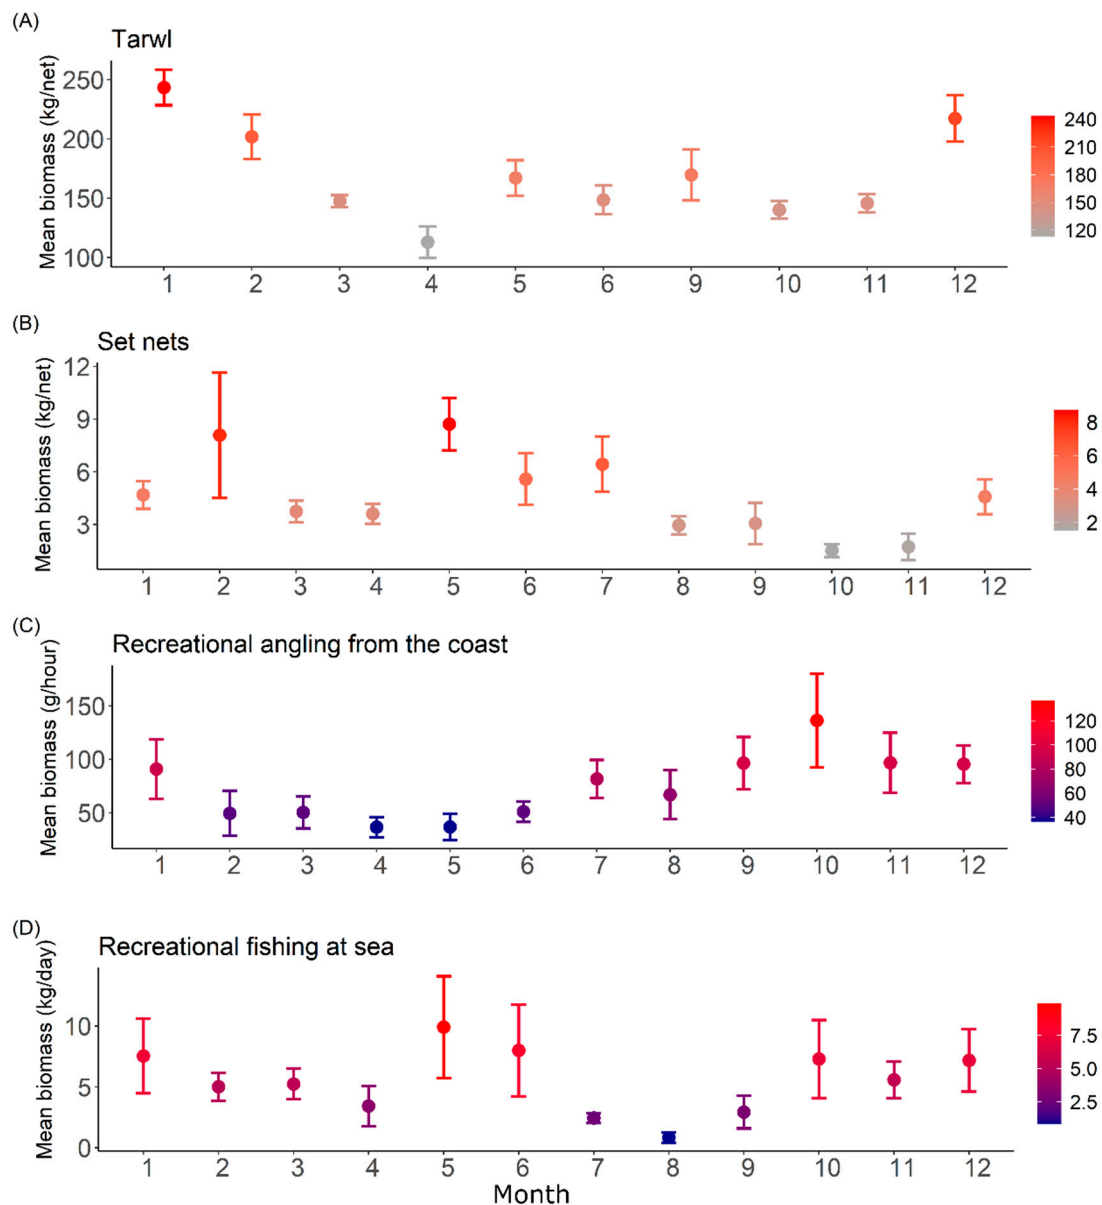

**Figure S7.** Mean catch biomass per day across months for (A) trawling (B) set nets and long-lines (C) recreational angling from the coast (D) recreational fishing at sea. Error bars represent standard error. We find that the biomass in all fishing methods reaches high values in winter (December-February). The recreational methods (angling from the coast and fishing at sea) both peak in fall (October-November). Recreational fishing at sea peak in the end of spring beginning of summer (May-June) is compatible with a peak in the set nets fishery at the same time.
